# Supplementary material for: Phenological Changes and Their Influencing Factors under the Joint Action of Water and Temperature in Northeast Asia
Source: MDPI journal article supplement (doi:10.3390/rs15225298), 2023-11-09
Supplement: s1 [file s1]

Archive with 1 entries (1 files):
- remotesensing-2625098-supplementary.pdf
